# Supplementary material for: Chemical vapor deposition (DLI-CVD) and characterization of multiphasic molybdate-based catalysts for propene oxidation
Source: Royal Society of Chemistry journal article supplement (doi:10.1039/d1cy02021h), 2022-01-01
Supplement: d1cy02021h1.pdf [file d1cy02021h1.pdf]

Electronic Supplementary Information

**Chemical Vapor Deposition (DLI-CVD) and Characterization of Multiphasic Molybdate-based Catalysts for Propene Oxidation**

A. Cherifi<sup>a</sup>, M. Aouine<sup>a</sup> J.M. Decams<sup>b</sup> C. Rocha<sup>c</sup>, V. Belliere-Baca<sup>c</sup>, J.M.M. Millet<sup>\*a</sup>

<sup>a</sup> Univ Lyon, Université Claude Bernard Lyon 1, CNRS, IRCELYON, 69626, Villeurbanne, France

<sup>b</sup> Annelsys 139 rue des Walkyries 34000 Montpellier, France

<sup>c</sup> Adisseo, Antony Parc 2, 10 Place Général de Gaulle, 92160 Antony, France

**Formula used for the catalytic property calculations**

Conversion of propene X(Pro) and selectivity to products S(X) (X=acrolein, CO,CO<sub>2</sub> acrylic acid and acetaldehyde) have been calculated using the following equations :

0—

—

The carbon balance was verified by calculating the ratio of the total number of carbon atoms in the products, including propene, to the number of carbon atoms in the propene feed. The analysis was considered as reliable when the carbon balance was higher than 98%.

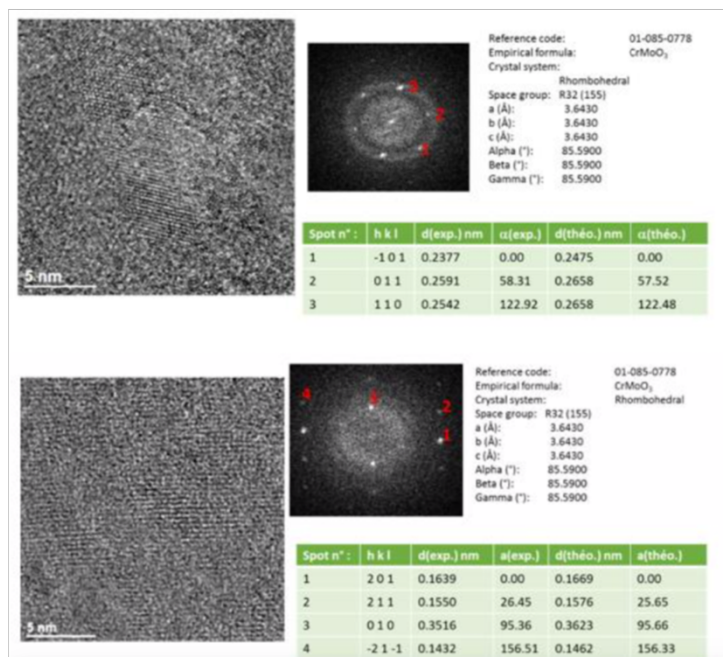

**Fig. S1:** Image and IFFT analysis of the intermediate layer. The zones of the image where IFT was made is indicated by red color square. The calculated parameters and angles are compared to those of the corresponding ICSD files.

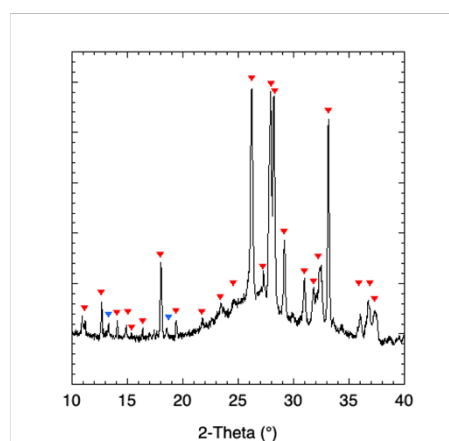

**Fig. S2:** X-ray diffraction pattern of a powdered sample collected on the external surface of the counter-tube of the DLI-CVD reactor
